# Supplementary material for: Genomic epidemiology of rifampicin ADP-ribosyltransferase (Arr) in the Bacteria domain
Source: PubMed Central journal article supplement (PMC8492726; doi:10.1038/s41598-021-99255-3), 2021-10-05
Supplement: 41598_2021_99255_MOESM1_ESM.pdf [file 41598_2021_99255_MOESM1_ESM.pdf]

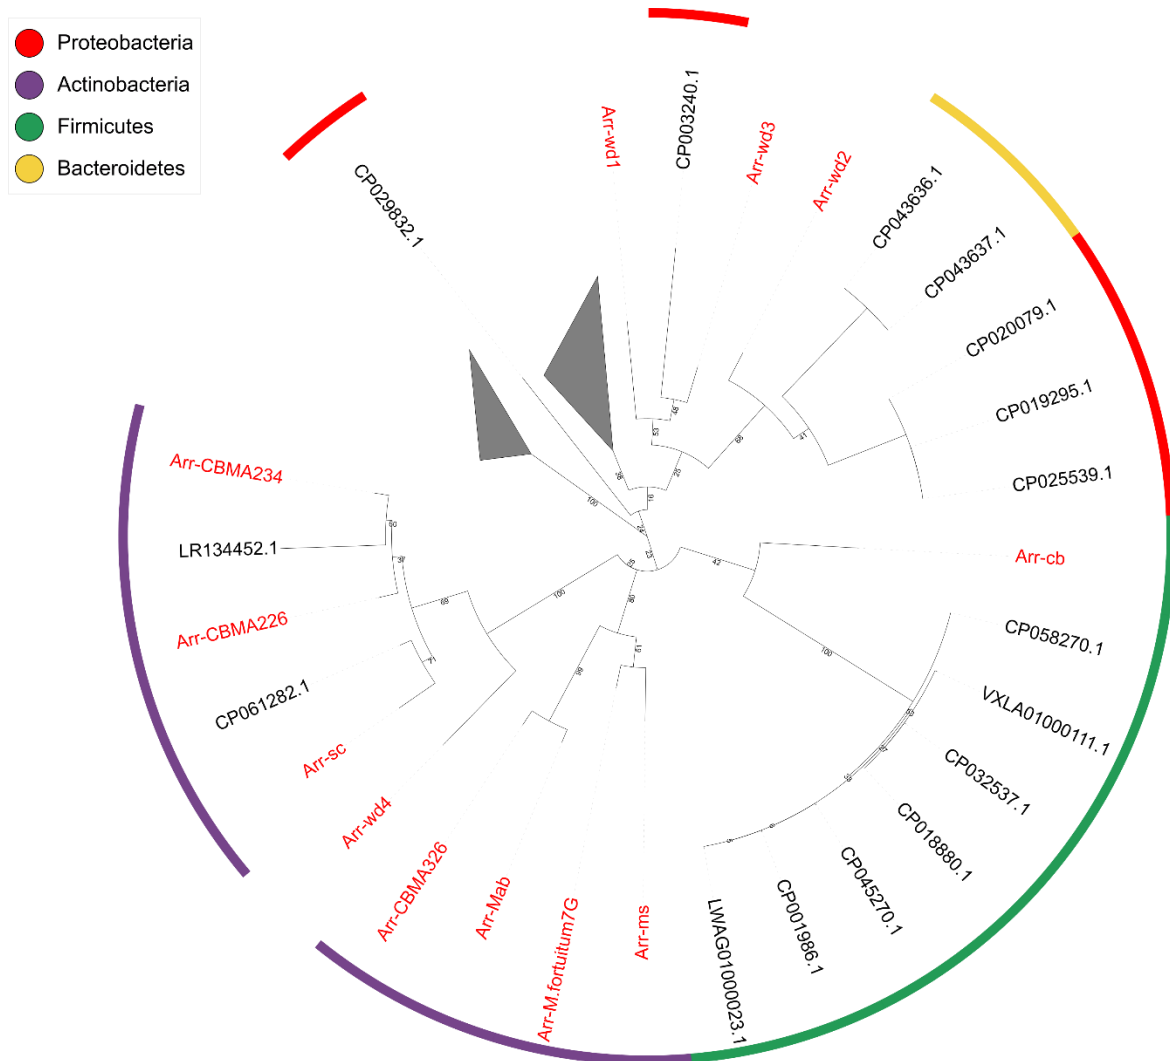

Figure S1: Plasmid Arr phylogeny generated by the maximum likelihood method. Two *Proteobacteria* clusters were collapsed, one with 273 sequences (including Arr-2 to Arr-8), and the other with 35 sequences. Bootstrap values above 50 are shown. The reference sequences are labelled in red and have been functionally characterized.
